# Supplementary material for: Self-healable, super tough graphene oxide–poly(acrylic acid) nanocomposite hydrogels facilitated by dual cross-linking effects through dynamic ionic interactions
Source: Royal Society of Chemistry journal article supplement (doi:10.1039/c5tb00075k), 2015-01-01
Supplement: c5tb00075k1.pdf [file c5tb00075k1.pdf]

Electronic Supplementary Material (ESI) for Journal of Materials Chemistry B.

This journal is © The Royal Society of Chemistry 2014

## Electronic Supplementary Information

# Self-healable, super tough graphene oxide/poly(acrylic acid) nanocomposite hydrogels facilitated by dual cross-linking effects through dynamic ionic interactions

Ming Zhong, Yi-Tao Liu and Xu-Ming Xie\*

Laboratory of Advanced Materials (MOE), Department of Chemical Engineering, Tsinghua University, Beijing 100084, China.

\*E-mail: [xcm-dce@mail.tsinghua.edu.cn](mailto:xm-dce@mail.tsinghua.edu.cn)

## Contents

### S1 Supplementary Figure

S1.1 Figure S1 UV-vis spectra of GO

### S2 Supplementary Table

S2.1 Supplementary Table S1

S2.2 Supplementary Table S2

S2.3 Supplementary Table S3

### S3 Supplementary videos

S3.1 Supplementary video 1

S3.2 Supplementary video 2

S3.3 Supplementary video 3

## S1 Supplementary Figure

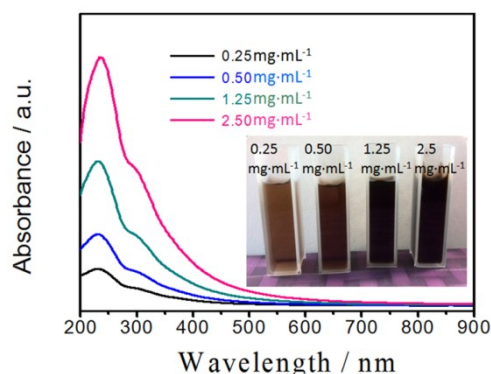

**Fig.S 1** UV-vis spectra of GO aqueous solutions at various GO concentrations, *i.e.*, 0.25, 0.50, 1.25 and 2.5 mg mL<sup>-1</sup>, respectively. The corresponding photographs are presented in the inset. All GO aqueous solutions are diluted by 10 times for the UV-vis measurements.

UV-vis spectra show two characteristic peaks at 239 nm and 302 nm attributed to the  $\pi \rightarrow \pi^*$  transition of aromatic C-C bonds and  $n \rightarrow \pi^*$  transition of C=O bonds, respectively. These spectra also indicate that homogeneous GO aqueous solutions are successfully obtained.

## S2 Supplementary Tables

**Table S1**

Table S1 Influence of the Fe<sup>3+</sup> ion content on the mechanical properties of GO/PAA nanocomposite hydrogels

| samples                    | Tensile strength / kPa | Elongation at break / % | Modulus / kPa | Work of extension / MJ m <sup>-3</sup> |
|----------------------------|------------------------|-------------------------|---------------|----------------------------------------|
| 0.1 mol % Fe <sup>3+</sup> | 272.6                  | 2185.6                  | 32.0          | 3.4                                    |
| 0.2 mol % Fe <sup>3+</sup> | 531.5                  | 2296.2                  | 35.6          | 5.9                                    |
| 0.5 mol % Fe <sup>3+</sup> | 777.3                  | 2980.7                  | 50.7          | 11.9                                   |
| 1.0 mol % Fe <sup>3+</sup> | 471.3                  | 1661.8                  | 35.9          | 3.7                                    |

The content of GO and total of water are fixed at 0.5 wt % and 80%.

**Table S2**

Table S2 Influence of the GO content on the mechanical properties of the GO/PAA nanocomposite hydrogels

| samples      | Tensile strength / kPa | Elongation at break / % | Modulus / kPa | Work of extension / MJ m <sup>-3</sup> |
|--------------|------------------------|-------------------------|---------------|----------------------------------------|
| Neat         | 411.8                  | 2024.6                  | 31.6          | 3.4                                    |
| 0.10 wt% GO  | 577.2                  | 2451.1                  | 36.3          | 5.8                                    |
| 0.25 wt % GO | 660.6                  | 2813.8                  | 47.0          | 8.4                                    |
| 0.50 wt% GO  | 777.3                  | 2980.7                  | 50.7          | 11.9                                   |
| 0.75 wt% GO  | 729.3                  | 2512.9                  | 74.8          | 9.3                                    |
| 1.00 wt% GO  | 711.0                  | 2074.7                  | 105.5         | 7.5                                    |

The content of Fe<sup>3+</sup> and total of water are fixed at 0.5 mol % and 80%.**Table S3**

Table S3 Influence of the water content on the mechanical properties of the GO/PAA nanocomposite hydrogels

| Samples / H <sub>2</sub> O | Tensile strength / kPa | Elongation at break / % | Modulus / kPa | Work of extension / MJ m <sup>-3</sup> |
|----------------------------|------------------------|-------------------------|---------------|----------------------------------------|
| 90 %                       | 75.6                   | 1740.1                  | 5.7           | 0.6                                    |
| 85 %                       | 274.3                  | 1819.3                  | 24.2          | 2.2                                    |
| 80 %                       | 777.3                  | 2980.7                  | 50.7          | 11.9                                   |
| 75 %                       | 844.1                  | 2290.5                  | 65.3          | 10.2                                   |
| 70 %                       | 862.5                  | 2056.6                  | 90.8          | 9.2                                    |

The content of GO and Fe<sup>3+</sup> are fixed at 0.5 wt % and 0.5 mol %.

## S3 Supplementary Videos

### Supplementary Video 1

The GO/PAA nanocomposite hydrogels (GO = 0.5 wt%, Fe<sup>3+</sup> = 0.5 mol%, H<sub>2</sub>O = 80 wt%) tube sample can be repeatedly blown up and immediately blown off. This movie shows the large deformation, recoverable behavior of the GO/PAA nanocomposite hydrogels.

### Supplementary Video 2

The balloon can maintain the configuration under high deformation, and can also be quickly recovered after being slightly compressed. This movie shows the super tough and highly stretchable properties of the GO/PAA nanocomposite hydrogels.

### **Supplementary Video 3**

This movie shows that the GO/PAA nanocomposite hydrogels (GO = 0.5 wt%, Fe<sup>3+</sup> = 0.5 mol%, H<sub>2</sub>O = 80 wt%) have good self-healing properties. The cut-off samples, after being treated at 45 °C for 48 h, can be stretched over 20 times compared to the original length.
